# Supplementary material
Source: MDPI journal article supplement (https://www.mdpi.com/2077-1312/10/1/19)
Supplement: s1 [file s1 › Figure S1.pdf]

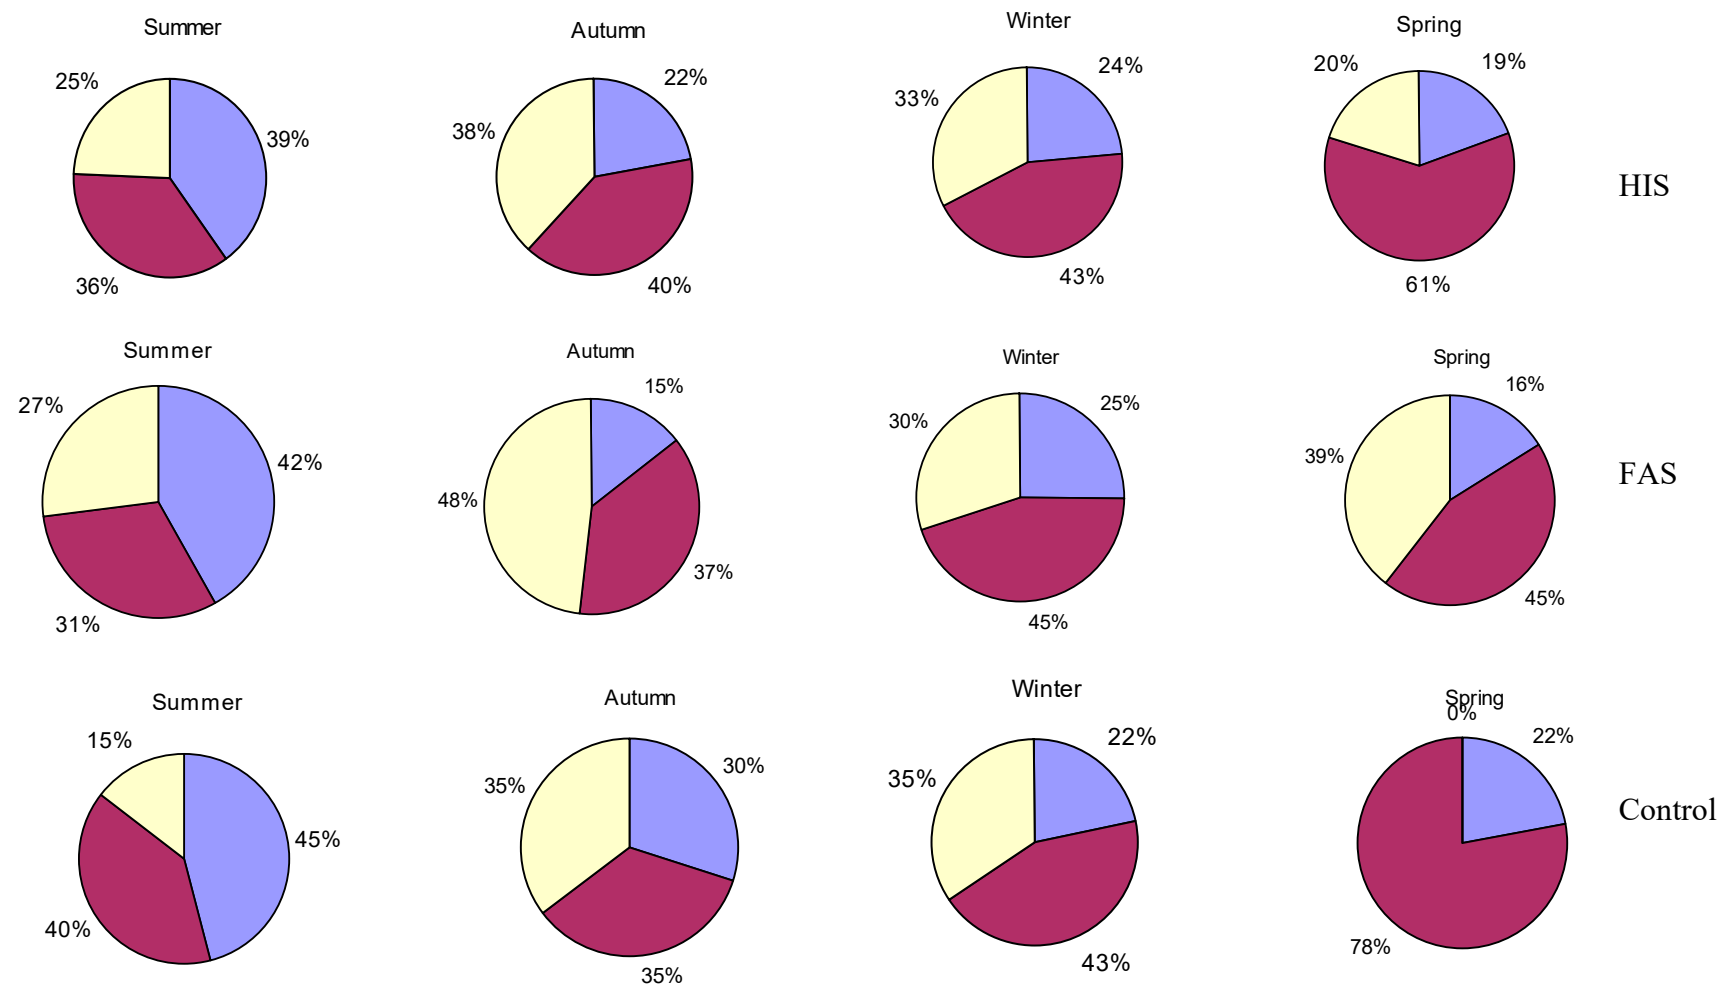

**Figure S1.** Seasonal percentage contribution of the main phytoplankton taxa: dinoflagellates (red), diatoms (blue), and other species (yellow) observed at human-impacted stations (HIS), freshwater-affected station (FAS) and marine control stations (Control)
