# Supplementary material
Source: MDPI journal article supplement (https://www.mdpi.com/2077-1312/10/1/19)
Supplement: s1 [file s1 › Figure S2.pdf]

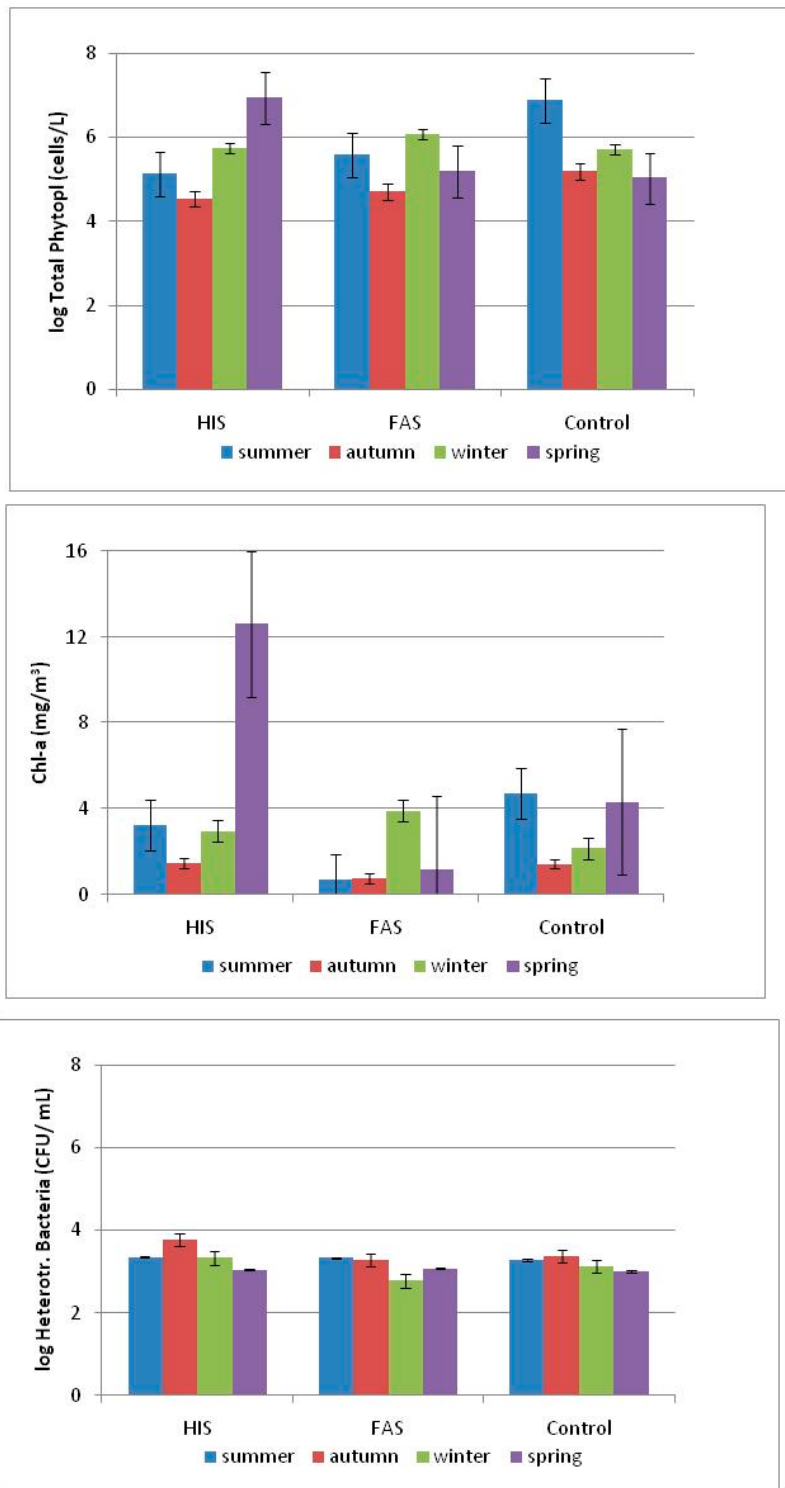

**Figure S2.** Seasonal patterns of total phytoplankton abundance and biomass (as Chlorophyll-a) and of heterotrophic bacteria at human-impacted stations (HIS), freshwater-affected station (FAS) and control stations
