# Supplementary material
Source: MDPI journal article supplement (https://www.mdpi.com/2077-1312/10/1/19)
Supplement: s1 [file s1 › Figure S3.pdf]

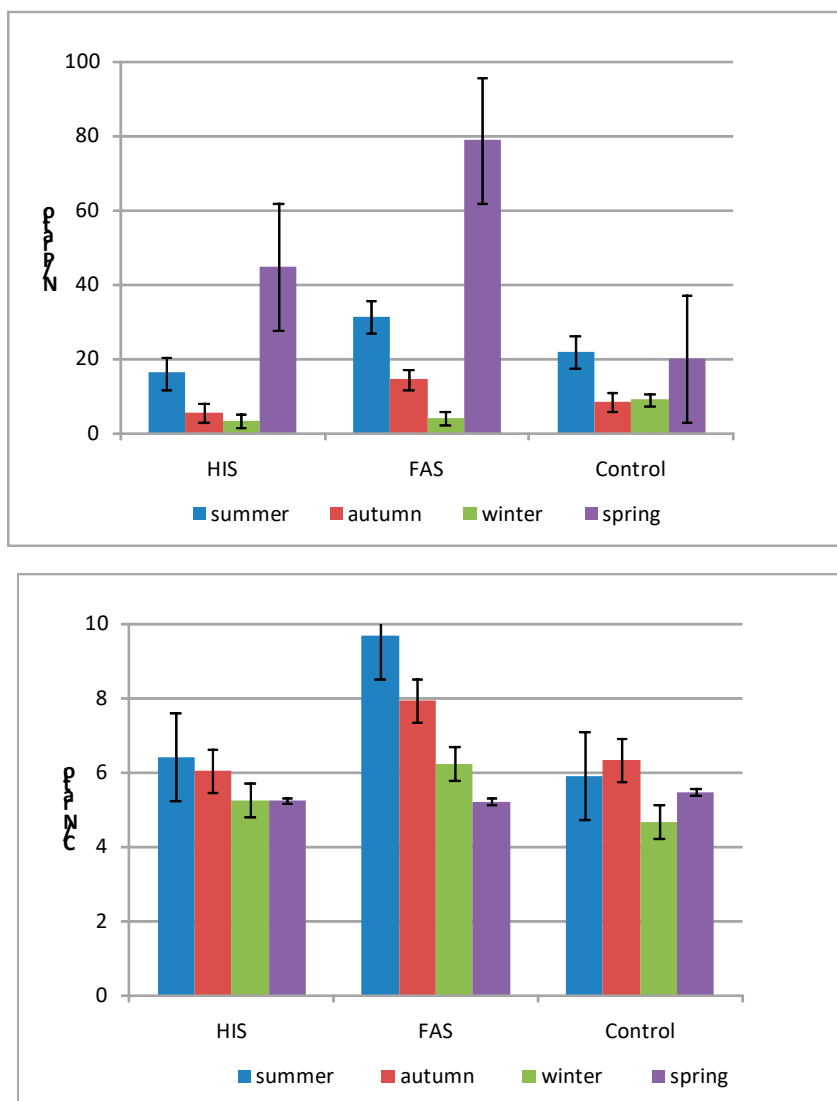

**Figure S3.** Seasonal patterns of N/P (above) and C/N ratios (below) obtained at human-impacted stations (HIS), freshwater-affected station (FAS) and control stations
