# Supplementary material
Source: MDPI journal article supplement (https://www.mdpi.com/2077-1312/10/1/19)
Supplement: s1 [file s1 › Figure S4.pdf]

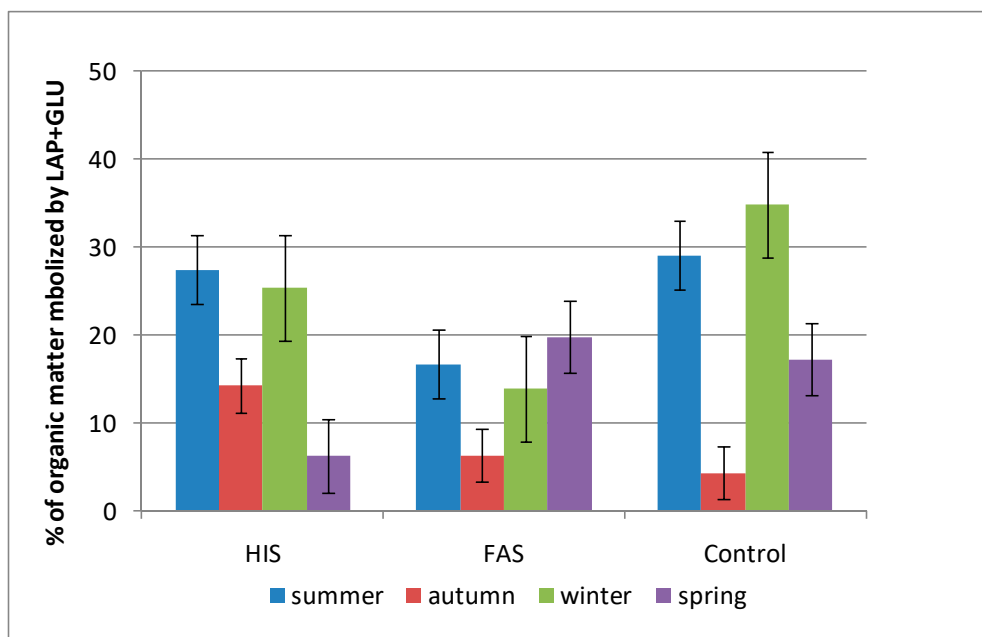

**Figure S4** Percentage of organic matter mobilized by LAP+ GLU activities calculated on a seasonal scale at human-impacted stations (HIS, stations 1, 3, 4), freshwater affected station (FAS, station 2) and control stations (stations 5 and 6).
