# Supplementary material
Source: MDPI journal article supplement (https://www.mdpi.com/2077-1312/10/1/19)
Supplement: s1 [file s1 › Table S1.pdf]

**Table S1.** Results of Analysis of Variance (ANOVA) performed on the environmental and microbiological dataset referred to surface waters (n=78)

| Parameter                         | Over space variability |      | Over time variability |      |
|-----------------------------------|------------------------|------|-----------------------|------|
|                                   | F                      | P    | F                     | P    |
| <i>Physical-chemical</i>          |                        |      |                       |      |
| Temperature                       | 0.031                  | n.s. | 351.61                | ***  |
| Salinity                          | 1.621                  | n.s. | 2.966                 | **   |
| Transparency                      | 16.279                 | ***  | 0.927                 | n.s. |
| Dissolved oxygen                  | 0.807                  | n.s. | 5.608                 | ***  |
| pH                                | 0.569                  | n.s. | 12.252                | ***  |
| <i>Trophic</i>                    |                        |      |                       |      |
| Total Phosphorus                  | 2.040                  | n.s. | 0.997                 | n.s. |
| Inorganic Phosphate               | 1.674                  | n.s. | 1.734                 | n.s. |
| Total Nitrogen                    | 0.391                  | n.s. | 2.555                 | n.s. |
| Dissolved Inorganic Nitrogen      | 1.401                  | n.s. | 3.152                 | n.s. |
| Ammonia                           | 0.947                  | n.s. | 1.695                 | n.s. |
| Nitrite                           | 0.851                  | n.s. | 1.559                 | n.s. |
| Nitrate                           | 1.397                  | n.s. | 2.782                 | n.s. |
| Total Suspended Matter            | 1.554                  | n.s. | 1.882                 | n.s. |
| Particulate Organic Carbon        | 1.024                  | n.s. | 2.315                 | n.s. |
| Particulate Nitrogen              | 1.123                  | n.s. | 2.716                 | n.s. |
| Carbon/Nitrogen ratio             | 2.844                  | n.s. | 1.682                 | n.s. |
| <i>Biological</i>                 |                        |      |                       |      |
| Total Phytoplankton abundance     | 0.316                  | n.s. | 0.738                 | n.s. |
| Chlorophyll-a                     | 1.762                  | n.s. | 4.427                 | ***  |
| Diatoms abundance                 | 1.040                  | n.s. | 0.577                 | n.s. |
| Dinoflagellates abundance         | 1.039                  | n.s. | 2.759                 | n.s. |
| Other taxa abundance              | 1.517                  | n.s. | 2.247                 | n.s. |
| Heterotrophic bacterial abundance | 2.016                  | n.s. | 6.988                 | ***  |
| Leucine AminoPeptidase            | 0.558                  | n.s. | 2.776                 | *    |
| Beta-Glucosidase                  | 0.943                  | n.s. | 0.749                 | n.s. |
| Alkaline Phosphatase              | 0.00099                | n.s. | 6.648                 | ***  |

\*, significant at  $p < 0.05$ ; \*\*, significant at  $p < 0.01$ ; \*\*\*, significant at  $p < 0.001$

n.s., not significant
