# Supplementary material
Source: MDPI journal article supplement (https://www.mdpi.com/2077-1312/10/1/19)
Supplement: s1 [file s1 › Table S2.pdf]

**Table S2.** List of main phytoplankton taxa and species identified over time at the different stations sampled in the Syracuse bay

| Taxa/species                              | Sept 2018       | May 2019 | Aug 2019         | Nov 2019      | July 2020 | Oct 2020    | March 2021       |
|-------------------------------------------|-----------------|----------|------------------|---------------|-----------|-------------|------------------|
| <b>DIATOMS</b>                            | <b>STATIONS</b> |          |                  |               |           |             |                  |
| <i>Asterionellopsis glacialis</i>         | 1, 2, 3, 6      |          |                  | 4, 5          |           |             |                  |
| <i>Auliscus</i> sp.                       |                 |          |                  |               |           |             | 4                |
| <i>Bacillaria paxillifera</i>             | 1               |          | 1                |               |           |             |                  |
| <i>Biddulphia</i> sp.                     | 1               |          |                  |               |           |             | 5                |
| <i>Chaetoceros curvisetus</i>             |                 |          |                  | 5, 6          |           |             |                  |
| <i>Chaetoceros decipiens</i>              | 3               |          | 1, 2, 4          | 1, 2, 5, 6    |           |             |                  |
| <i>Chaetoceros delicatulus</i>            |                 |          | 6                |               |           |             |                  |
| <i>Chaetoceros lauderi</i>                |                 |          | 1                |               |           | 4           |                  |
| <i>Chaetoceros lorenzianus</i>            |                 |          |                  | 5             |           |             |                  |
| <i>Chaetoceros</i> spp.                   | 2               | 2, 5, 6  | 1, 2, 3, 4, 5, 6 | 4, 5          | 4, 5      |             |                  |
| <i>Cocconeis</i> sp.                      |                 |          |                  | 1             |           |             |                  |
| <i>Cyclotella</i> spp.                    | 2               |          | 4                |               | 3         | 4, 5, 6     |                  |
| <i>Cylindrotheca closterium</i>           | 1, 2, 3, 5      |          |                  | 1, 2, 4       | 4         | 1*          |                  |
| <i>Diploneis</i> sp.                      | 2               |          |                  |               |           |             |                  |
| <i>Grammatophora</i> sp.                  |                 |          |                  | 1             |           |             |                  |
| <i>Guinardia delicatula</i>               |                 |          |                  | 5, 6          |           |             |                  |
| <i>Guinardia striata</i>                  |                 |          | 6                | 4, 5          | 6         |             |                  |
| <i>Hemiaulus hauckii</i>                  | 2               |          |                  |               |           |             |                  |
| <i>Hemiaulus sinensis</i>                 | 6               |          |                  |               |           |             |                  |
| <i>Leptocylindrus danicus</i>             |                 |          |                  | 1, 5, 6       |           |             |                  |
| <i>Leptocylindrus minimus</i>             | 1               |          |                  |               |           |             |                  |
| <i>Leptocylindrus</i> sp.                 | 5               |          |                  | 4             |           |             |                  |
| <i>Licmophora</i> sp.                     |                 |          |                  | 1             |           | 1*, 6       | 1, 2, 6          |
| <i>Melosira</i> sp.                       |                 |          |                  | 1, 2          |           |             |                  |
| <i>Navicula</i> spp.                      | 1, 2, 3, 4      | 6        | 1, 2             | 1, 2, 4, 5, 6 | 1, 4      | 1*, 3, 4, 5 | 1, 3             |
| <i>Nitzschia longissima</i>               | 3, 4, 5         |          | 1, 4, 6          | 1             |           | 4           |                  |
| <i>Nitzschia reversa</i> f. <i>parva</i>  | 1               |          |                  |               |           |             |                  |
| <i>Nitzschia</i> spp.                     |                 |          |                  |               |           | 4           |                  |
| <i>Pleurosigma</i> spp.                   | 1, 2, 5         | 1        | 1                | 1, 6          |           | 1*          | 1, 3, 4, 5       |
| <i>Proboscia alata</i>                    | 1               |          |                  | 4             |           |             |                  |
| <i>Proboscia indica</i>                   | 1               |          |                  |               |           |             |                  |
| <i>Pseudo-nitzschia delicatissima</i>     |                 |          |                  | 1, 5, 6       | 4         | 4           |                  |
| <i>Pseudo-nitzschia seriata</i>           | 5               |          |                  | 5             |           | 1           |                  |
| <i>Pseudo-nitzschia</i> spp.              | 1               |          |                  | 6             |           |             | 1                |
| <i>Rhizosolenia</i> sp.                   |                 | 1, 3     |                  |               |           |             |                  |
| <i>Skeletonema costatum</i>               | 1, 2, 3, 6      |          |                  | 1             | 4         |             |                  |
| <i>Skeletonema costatum</i> -like species | 3, 5            | 1, 2, 6  |                  | 1, 6          | 3, 4      | 4           |                  |
| <i>Skeletonema marinoi</i>                | 1, 2, 3, 6      |          |                  |               |           |             |                  |
| <i>Striatella unipunctata</i>             | 5               | 4        | 4, 5             |               |           | 1, 2, 4, 6  | 1, 2, 4, 5, 6    |
| <i>Synedra</i> spp.                       | 1, 2, 5         |          | 1                | 1             |           |             |                  |
| <i>Thalassionema nitzschioides</i>        |                 |          |                  | 5, 6          | 2, 4      | 1           | 1, 2, 3, 4, 5, 6 |
| <i>Toxarium hennedyanum</i>               |                 |          | 1                |               |           |             |                  |
| <i>Trieres regia</i>                      |                 |          |                  |               |           | 1           |                  |

**DINOFLAGELLATES****STATIONS**

|                                                       |            |                  |                  |                  |                  |               |                  |
|-------------------------------------------------------|------------|------------------|------------------|------------------|------------------|---------------|------------------|
| <i>Akashiwo sanguinea</i>                             |            |                  |                  | 1, 2             |                  | 1, 2, 3, 6    |                  |
| <i>Alexandrium catenella</i> (= <i>A. pacificum</i> ) |            | 1, 3, 4, 5, 6    | 1                |                  |                  | 1             | 6                |
| <i>Alexandrium minutum</i>                            |            | 1, 2, 3, 4, 5, 6 | 6                |                  |                  | 1, 3          | 1, 2, 3, 4, 5, 6 |
| <i>Alexandrium</i> sp.                                | 2          | 1, 4             |                  |                  | 1                | 1             | 1, 3, 4, 5, 6    |
| <i>Blixaea quinquecornis</i>                          | 4          |                  |                  |                  | 1, 3             |               |                  |
| <i>Ceratium furca</i>                                 |            |                  |                  |                  |                  |               | 4, 6             |
| <i>Dinophysis caudata</i>                             | 1, 3, 5    |                  |                  | 2                | 2                |               | 6                |
| <i>Dinophysis sacculus</i>                            |            | 2, 4             |                  |                  | 3                |               | 6                |
| <i>Diplopsalis</i> sp.                                | 5          |                  | 1                |                  | 1                | 1             | 1, 2, 6          |
| <i>Gonyaulax digitale</i>                             |            |                  |                  |                  | 2                |               |                  |
| <i>Gonyaulax</i> sp.                                  | 2          |                  |                  |                  |                  |               |                  |
| <i>Gonyaulax spinifera</i>                            |            | 4                |                  |                  |                  |               |                  |
| <i>Gotoius excentricus</i>                            | 1          |                  |                  |                  |                  |               |                  |
| <i>Gymnodinium</i> spp.                               | 1, 4       | 1                | 4, 6             |                  | 1, 2, 3, 4, 5, 6 | 1, 2, 3, 4, 6 |                  |
| <i>Gyrodinium</i> cf. <i>fusiforme</i>                |            |                  |                  |                  |                  | 4, 5, 6       |                  |
| <i>Gyrodinium</i> sp.                                 |            |                  |                  | 6                |                  | 1, 4          |                  |
| <i>Lingulodinium polyedra</i>                         |            | 1, 2, 3, 4, 5, 6 | 6                | 2, 3             |                  |               | 1, 2             |
| <i>Ostreopsis</i> sp.                                 |            |                  |                  | 2                | 1*, 6*           | 1*            |                  |
| <i>Oxytoxum scolopax</i>                              |            |                  |                  |                  |                  | 4             |                  |
| <i>Oxytoxum</i> sp.                                   |            |                  |                  |                  |                  |               | 1                |
| <i>Peridinium diabolum</i>                            |            |                  |                  |                  |                  |               | 1                |
| <i>Peridinium quadridentatum</i>                      | 4          | 1, 3, 6          | 6                | 1, 4             |                  |               |                  |
| <i>Peridinium</i> sp.                                 | 2          |                  |                  |                  |                  |               |                  |
| <i>Phalachroma rotundatum</i>                         |            |                  |                  |                  |                  | 4             |                  |
| <i>Polykrikos schwartzii</i>                          |            | 1                |                  |                  |                  |               |                  |
| <i>Polykrikos</i> sp.                                 |            | 3                |                  |                  |                  |               |                  |
| <i>Prorocentrum aporum</i>                            |            |                  | 1                | 2                | 3, 4             |               |                  |
| <i>Prorocentrum</i> cf. <i>gracile</i>                |            |                  |                  |                  |                  |               | 4                |
| <i>Prorocentrum</i> cf. <i>lima</i>                   |            |                  |                  |                  |                  | 1*            |                  |
| <i>Prorocentrum cordatum</i>                          | 1          |                  |                  |                  |                  |               |                  |
| <i>Prorocentrum micans</i>                            |            | 1, 2, 3, 4, 5, 6 | 1, 4, 6          | 1, 6             | 2, 4, 5, 6       | 1             | 1, 2, 3, 4, 6    |
| <i>Prorocentrum rotundatum</i>                        | 5          |                  |                  |                  |                  |               |                  |
| <i>Prorocentrum</i> sp.                               |            |                  |                  |                  | 2                | 4             |                  |
| <i>Prorocentrum triestinum</i>                        | 1, 3       | 1, 2, 3, 4, 5, 6 | 6                | 2                | 1, 3, 4, 5       |               | 1, 3, 4, 5, 6    |
| <i>Protoperidinium bipes</i>                          |            |                  |                  |                  | 1                |               |                  |
| <i>Protoperidinium cerasus</i>                        |            |                  |                  |                  |                  | 4             |                  |
| <i>Protoperidinium diabolus</i>                       | 4          | 4                | 4, 6             |                  | 1                |               | 1, 4             |
| <i>Protoperidinium divergens</i>                      |            | 2                | 3, 4             | 2                | 2, 3             |               | 6                |
| <i>Protoperidinium granii</i>                         | 4          |                  | 1                |                  |                  |               |                  |
| <i>Protoperidinium pallidum</i>                       |            |                  |                  |                  |                  |               |                  |
| <i>Protoperidinium pellucidum</i>                     |            |                  |                  | 1, 2             |                  |               |                  |
| <i>Protoperidinium</i> sp.                            | 1, 2, 3, 6 | 2, 3, 6          | 1, 2, 3, 4, 5, 6 | 1, 2, 3, 4, 5, 6 | 1, 2, 4, 5       | 1, 3, 6       | 1, 3, 4, 5, 6    |
| <i>Pyrophacus steinii</i>                             |            |                  |                  |                  |                  | 1             |                  |
| <i>Scrippsiella</i> sp.                               | 5, 6       | 1, 3, 4          | 4                | 3                | 3                | 2, 5          | 6                |
| <i>Triadinium polyedricum</i>                         |            |                  |                  |                  |                  |               | 6                |
| <i>Tripes eugrammus</i>                               | 3, 4       |                  |                  | 5                |                  |               |                  |
| <i>Tripes furca</i>                                   | 1, 4       |                  | 1                |                  |                  |               |                  |
| <i>Tripes gibberus</i>                                |            |                  |                  |                  |                  | 1             |                  |
| <i>Tripes setaceus</i>                                |            |                  |                  | 5                |                  |               |                  |
| <i>Tripes subrobustus</i>                             |            |                  |                  | 1                | 1                |               |                  |
| <i>Tripes</i> sp.                                     | 1          |                  |                  |                  |                  |               |                  |
| <i>Tripes teres</i>                                   |            |                  |                  | 1                |                  |               |                  |

\* from benthic substrate (macroalgae)

**OTHER TAXA****CYANOPHYCEAE****STATIONS**

|                         |   |  |  |  |  |  |  |
|-------------------------|---|--|--|--|--|--|--|
| <i>Oscillatoria</i> sp. | 1 |  |  |  |  |  |  |
|-------------------------|---|--|--|--|--|--|--|

**EUGLENOPHYCEAE****STATIONS**

|                         |      |  |  |  |  |  |   |
|-------------------------|------|--|--|--|--|--|---|
| <i>Lepocinclis acus</i> | 1, 3 |  |  |  |  |  | 1 |
|-------------------------|------|--|--|--|--|--|---|

**COCCOLITHOPHORES****STATIONS**

|                          |  |   |  |   |  |  |  |
|--------------------------|--|---|--|---|--|--|--|
| <i>Emiliania huxleyi</i> |  |   |  | 2 |  |  |  |
| <i>Syracolithus</i> sp.  |  | 2 |  |   |  |  |  |

**SILICOFLAGELLATES****STATIONS**

|                                 |  |  |  |      |  |  |  |
|---------------------------------|--|--|--|------|--|--|--|
| <i>Dictyocha fibula</i>         |  |  |  | 6    |  |  |  |
| <i>Parapedinella reticulata</i> |  |  |  | 4, 6 |  |  |  |
