# Supplementary material
Source: MDPI journal article supplement (https://www.mdpi.com/2077-1312/10/1/19)
Supplement: s1 [file s1 › Table S3.pdf]

**Table S3.** Pearson correlation coefficients calculated among biotic and abiotic parameters. The highly significant relationships ( $P<0.01$ ) are reported in bold.

| Positive relations with |                                                  |                               |                               | Negative relations with |                         |                     |
|-------------------------|--------------------------------------------------|-------------------------------|-------------------------------|-------------------------|-------------------------|---------------------|
|                         | Stat 1, 3, 4 (n=56)                              | Stat 2 (n=8)                  | Stat 5 and 6 (n=15)           | Stat 1, 3, 4 (n=56)     | Stat 2 (n=8)            | Stat 5 and 6 (n=15) |
| Tot Phytopl.            | NO3, TN, Chl,<br>POC, PN                         | Chl, Dinofl                   | pH                            | Transp, S               | Het. Bacteria           |                     |
| Diatoms                 | T, pH, C/N                                       | pH, POC, C/N                  | pH                            | S, DO                   | DO                      |                     |
| Dinofl.<br>Others       | NO3, TN, Chl,<br>POC, PN                         | Chl, Phaeo, Tot<br>Phytopl    | TSM, NO2                      | Transp, S               | T, Het. Bacteria<br>LAP | NH4<br>Chl          |
| Chl-a                   | POC, PN, TN,<br>NO3, Tot<br>Phytopl, Dinofl      | Tot Phytopl,<br>Dinofl, Phaeo | pH, NO3, POC,<br>PN           | Transp, S               | Het. Bacteria           | S                   |
| Phaeo                   | POC, PN, T, pH,<br>NO3, Het.<br>Bacteria, Dinofl |                               | C/N                           | TP, NH4                 | T, Het. Bacteria        | DO                  |
| Heter. bacteria         | PO4, Phaeo                                       | T, Transp                     | TSM                           |                         |                         |                     |
| LAP                     | T, Transp, TN,<br>NH4, NO3, GLU,<br>DO, pH       | TN, AP                        | TN, GLU                       | S,TP                    | Transp, Others          | Transp              |
| GLU                     | TN, NO3                                          |                               | POC, PN, C/N,<br>NH4, NO3, TN | S                       | Transp                  | S, Transp           |
| AP                      | TN, NO3, LAP,<br>GLU, T, pH                      | TN, LAP, pH                   | LAP, GLU, T,<br>pH, NO3, TN   | S,TP                    | S                       | Transp              |
| T                       | pH, C/N, LAP,<br>AP, Diatoms                     | Transp                        | pH                            | DO, TP, NO2             |                         | DO                  |

|        |                                      |              |                    |                                          |                     |                         |
|--------|--------------------------------------|--------------|--------------------|------------------------------------------|---------------------|-------------------------|
| S      | TSM                                  |              | Transp             | pH, TP, NH4,<br>NO3, TN, POC,<br>PN, Chl | pH, NO3, TN         | pH, NO3, TN,<br>POC, PN |
| Transp |                                      | T            | S                  | POC, PN, Chl,<br>TSM, PO4                | DO                  | NO3, TN, POC,<br>PN     |
| DO     |                                      |              |                    | T, C/N                                   | Transp, POC,<br>C/N | T                       |
| pH     | T, TN, C/N                           |              | T, NO3             | S, TP                                    | S                   | S                       |
| PO4    | TP, NO2                              |              |                    | Transp                                   |                     |                         |
| TP     | TN, NO2, PO4                         | NO2          |                    | T, S, pH                                 |                     |                         |
| NH4    | TN                                   | NO3, NO2, TN | TN                 | S, TSM                                   |                     |                         |
| NO2    | NO3, POC, TP,<br>PO4                 | TP, NO3      |                    | T                                        |                     | C/N                     |
| NO3    | TN, POC, PN,<br>Chl                  | NH4, NO2, TN | pH, TN, POC,<br>PN | S, C/N                                   | S                   | S                       |
| TN     | TP, pH, NH4,<br>NO3, POC, PN,<br>Chl | NH4, NO3     | POC, PN            | S, C/N                                   | S                   | S, Transp               |
| TSM    |                                      |              |                    | Transp, NH4                              |                     |                         |
| POC    | NO3, TN, PN                          | PN           | PN                 | S, Transp                                | DO                  | S, Transp               |
| PN     | NO2, NO3, TN,<br>POC                 | POC          | POC                | S, Transp                                |                     | S, Transp               |
| C/N    | T,pH                                 | POC          |                    | DO, NO3, TN                              | DO                  |                         |
