# Supplementary material
Source: MDPI journal article supplement (https://www.mdpi.com/2077-1312/10/1/19)
Supplement: s1 [file s1 › Table S4.pdf]

**Table S4.** Multiple regression analysis among dependent (biological variables) and independent parameters (environmental variables) at Human-impacted stations (HIS). Only the significant relationships ( $P < 0.05$ ) are shown

|           | Dependent variables | HIS                                        |
|-----------|---------------------|--------------------------------------------|
| Abundance | Total Phytoplankton | PO4(-), NO2(+)                             |
|           | Dinoflagellates     | NO2(+)                                     |
| Biomass   | Phaeo               | T(+), DO(+);<br>PO4(+), NH4 (-),<br>NO2(-) |
| Activity  | LAP                 | T(+), DO(+), NH4(-),<br>NO3(-), TN(+)      |
|           | GLU                 | TN (+)                                     |
|           | AP                  | DO(+), pH(+), NO3(-),<br>TN(+)             |
|           | MANOVA              |                                            |
|           | Wilks' lambda       | $1.62 \times 10^{-21}$                     |
|           | F                   | 41.77                                      |
|           | P                   | $1.13 \times 10^{-11}$                     |
