# Supplementary material
Source: MDPI journal article supplement (https://www.mdpi.com/2077-1312/10/1/19)
Supplement: s1 [file s1 › Table S5.pdf]

**Table S5.** Results of similarity percentage (SIMPER) analysis within and between “Season” groups.

| Within season GROUPS | Average squared distance | Variable | Contrib% | Between season GROUPS | Average squared distance | Variable      | Contrib% |
|----------------------|--------------------------|----------|----------|-----------------------|--------------------------|---------------|----------|
| Summer               | 26.43                    | AP       | 9.24     | Summer & autumn       | 43.95                    | Het. Bacteria | 8.76     |
|                      |                          | GLU      | 9.40     |                       |                          | TSM           | 8.71     |
|                      |                          | Diatom   | 9.90     |                       |                          | Others        | 8.17     |
|                      |                          | LAP      | 10.98    |                       |                          | AP            | 7.20     |
| Autumn               | 13.36                    |          |          |                       |                          | pH            | 6.94     |
|                      |                          | C/N      | 8.47     |                       |                          | LAP           | 6.47     |
|                      |                          | PO4      | 13.40    | Summer & winter       | 55.19                    | T             | 12.29    |
|                      |                          | Others   | 26.99    |                       |                          | NO2           | 12.02    |
|                      |                          | TSM      | 29.81    |                       |                          | DO            | 7.52     |
|                      |                          |          |          |                       |                          |               |          |
|                      |                          |          |          | Summer & spring       | 62.42                    | Dinoflag      | 7.08     |
|                      |                          |          |          |                       |                          | PN            | 6.68     |
|                      |                          |          |          |                       |                          | T             | 6.63     |
|                      |                          |          |          |                       |                          | POC           | 6.61     |
|                      |                          |          |          |                       |                          | Chl-a         | 6.21     |
| Spring               | 35.06                    | Chl-a    | 9.10     | Spring & autumn       | 49.30                    | Het. Bacteria | 10.11    |
|                      |                          | NO3      | 11.25    |                       |                          | Chl-a         | 9.35     |
|                      |                          | PN       | 13.18    |                       |                          | Dinoflag      | 8.96     |
|                      |                          | POC      | 13.61    |                       |                          | TSM           | 8.92     |
|                      |                          | Dinoflag | 13.65    |                       |                          | TN            | 8.65     |
|                      |                          |          |          |                       |                          | POC           | 8.55     |
|                      |                          |          |          | Spring & winter       | 51.06                    | NO2           | 13.54    |
|                      |                          |          |          |                       |                          | PN            | 8.79     |
|                      |                          |          |          |                       |                          | POC           | 8.78     |
|                      |                          |          |          |                       |                          | Dinoflag      | 8.18     |
|                      |                          |          |          |                       |                          | PO4           | 8.07     |
|                      |                          |          |          | Autumn & winter       | 29.52                    | NO2           | 21.00    |
|                      |                          |          |          |                       |                          | TSM           | 10.13    |
|                      |                          |          |          |                       |                          | Het. Bacteria | 10.02    |
|                      |                          |          |          |                       |                          | Others        | 9.69     |
|                      |                          |          |          |                       |                          | PO4           | 8.21     |
